# Supplementary material for: Identification of QTLs and Candidate Genes Related to Flower Traits and Bolting Time in Radish (Raphanus sativus L.)
Source: MDPI journal article supplement (doi:10.3390/agronomy11081623), 2021-08-16
Supplement: s1 [file s1]

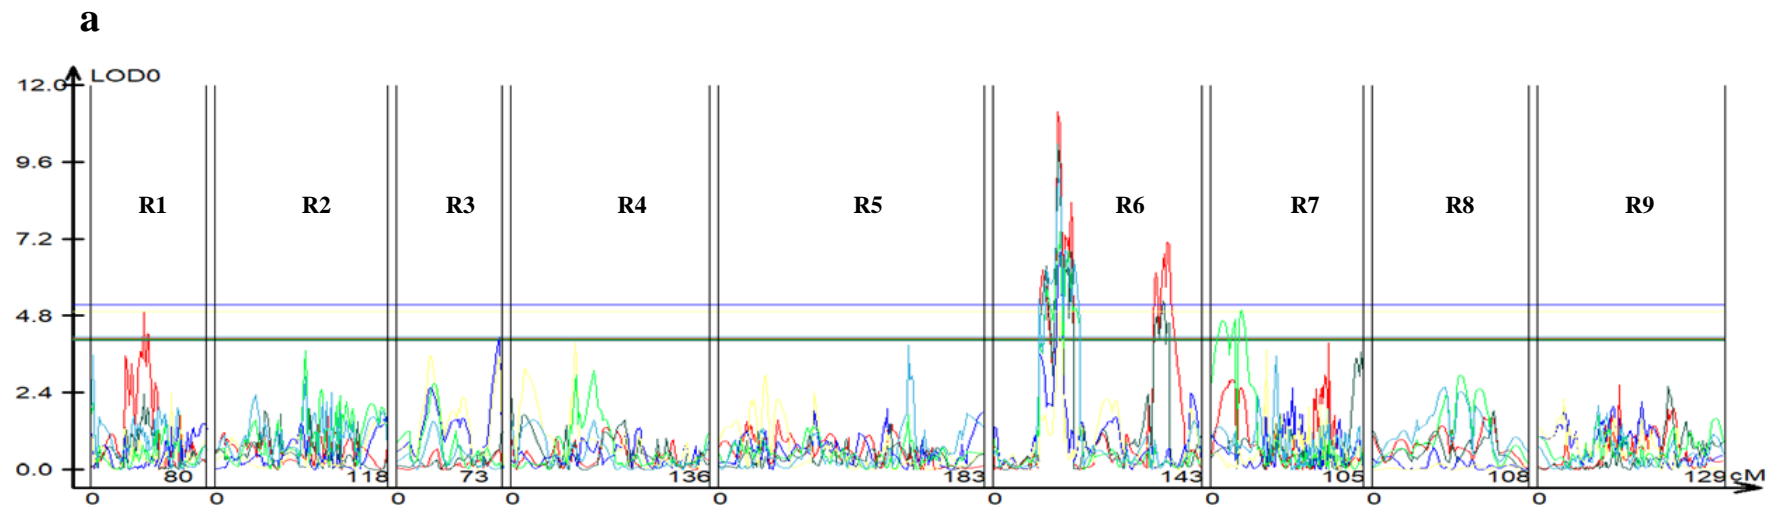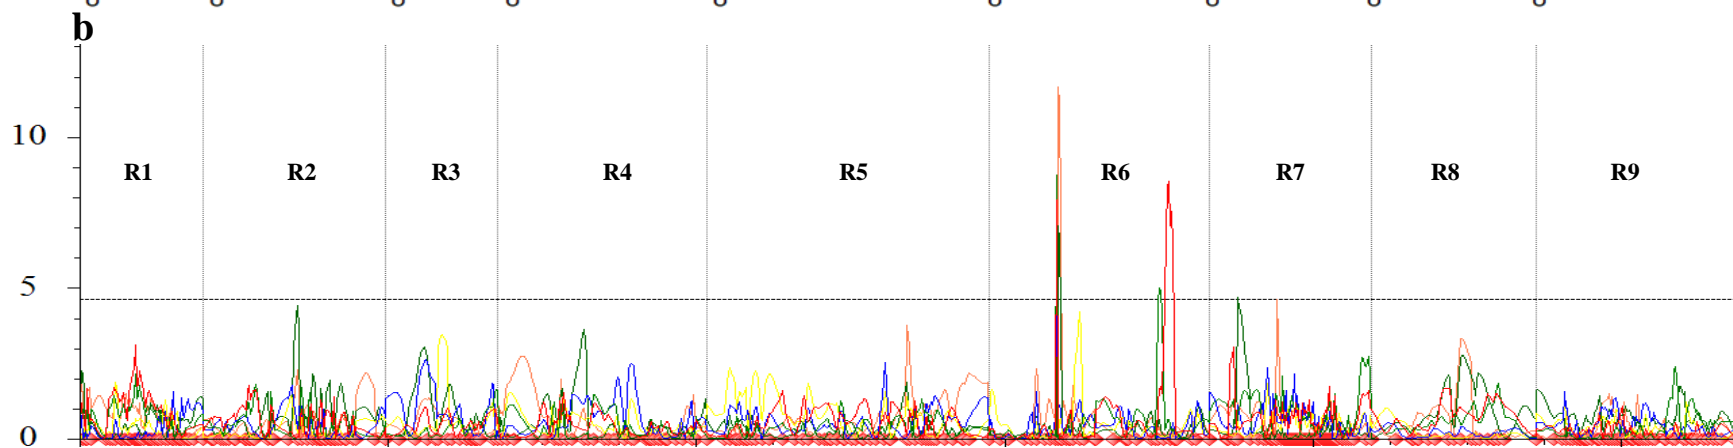

- Bolting time, spring 2018
- Flowering time, spring 2018
- Bolting time, autumn 2018
- Flowering time, autumn 2018
- Bolting time, spring 2017
- Flowering time, spring 2017
