# Supplementary figures and images for: Identification of QTLs and Candidate Genes Related to Flower Traits and Bolting Time in Radish (Raphanus sativus L.)
Source: MDPI journal article supplement (doi:10.3390/agronomy11081623), 2021-08-16

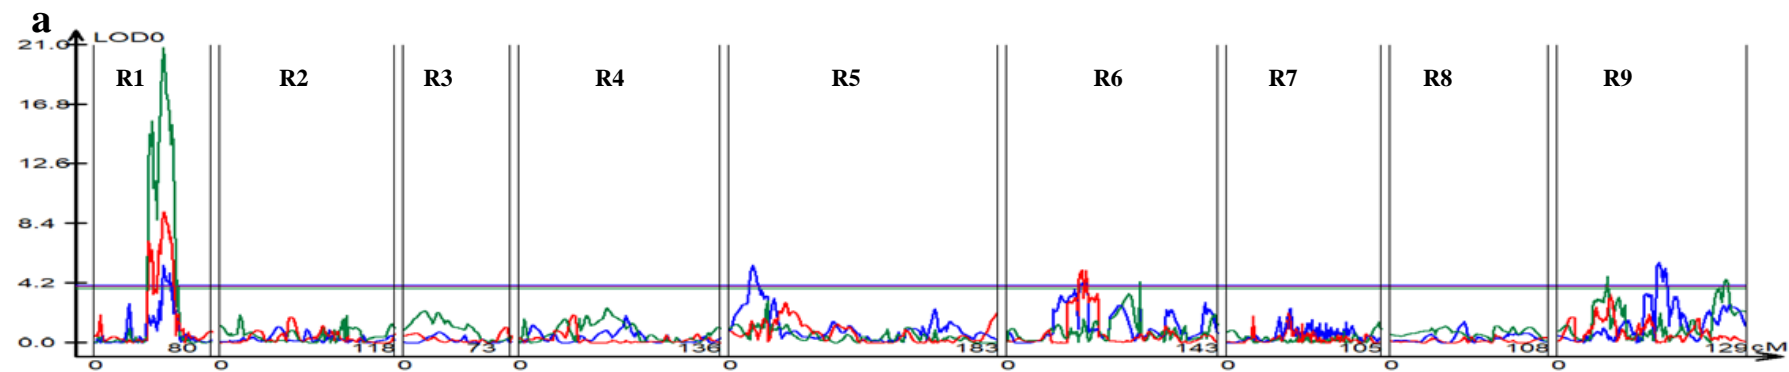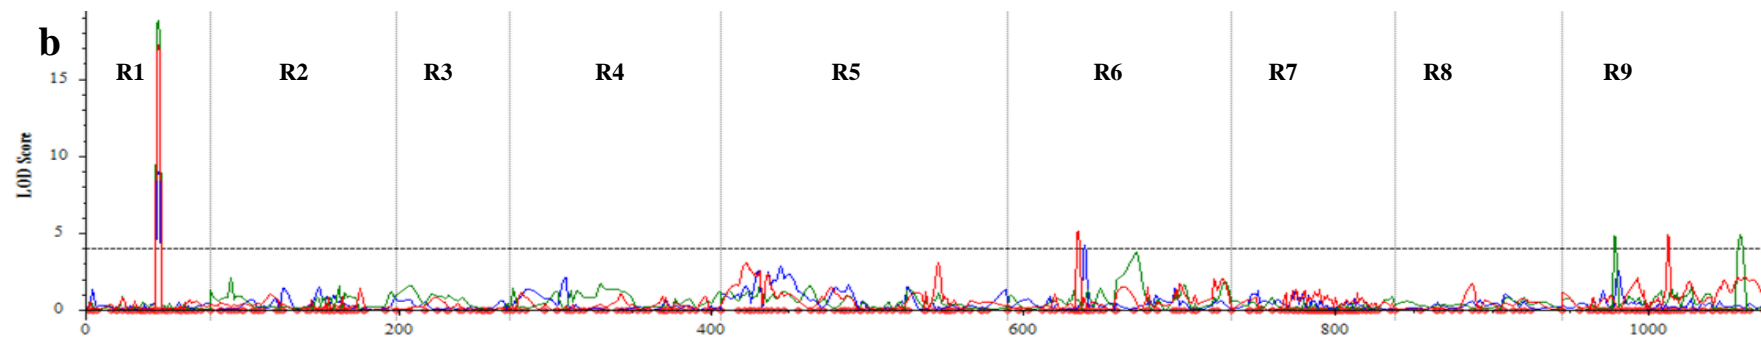

— Spring 2018  
— Autumn 2018  
— Spring 2017

Supplement: s1 [file s1]

Rs314940

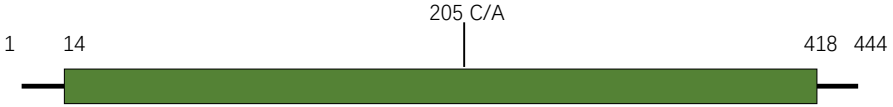

Rs315000

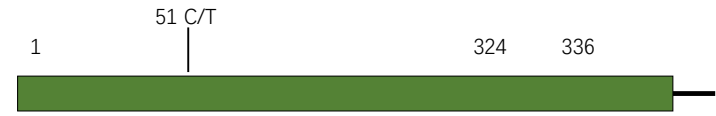

Rs315960

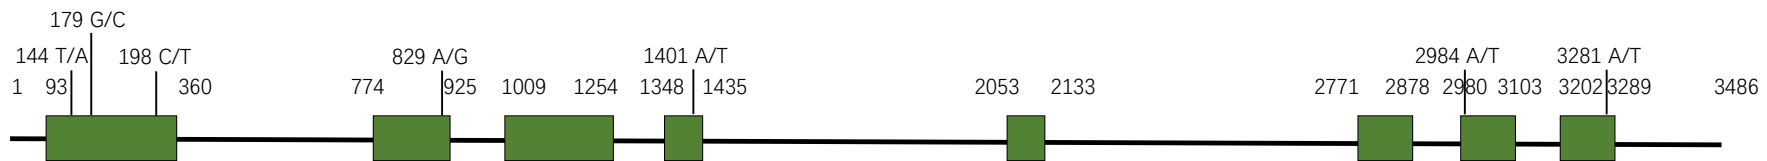

Rs315310

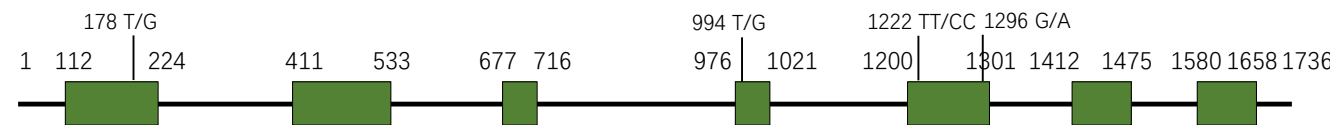

Supplement: s1 [file s1]
